# Supplementary material for: An antagonism between Spinophilin and Syd-1 operates upstream of memory-promoting presynaptic long-term plasticity
Source: eLife. 2023 Sep 28;12:e86084. doi: 10.7554/eLife.86084 (PMC10588984; doi:10.7554/eLife.86084)
Supplement: Figure 1—figure supplement 1—source data 1. [file elife-86084-fig1-figsupp1-data1.xlsx]

## Sheet: Sheet1
Figure 1 - Figure supplement 1	Parameter	Genotype (n)	Mean	SEM	P	U	t, df	test
b	BRP intensity (normalized to control)	w1118 -PhTx	100	8.344
		w1118 +PhTx	140.7	5.248	0.0002		t=4.351, df=23	Unpaired t test
d	BRP intensity (normalized to control)	Nrx-1 -PhTx (10)	100	3.547
		Nrx-1 +PhTx (11)	122.8	5.565	0.0032		t=3.377, df=19	Unpaired t test
f	BRP intensity (normalized to control)	Nlg1 -PhTx (19)	100	8.375
		Nlg1 +PhTx (21)	134.1	10.39	0.016		t=2.522, df=38	Unpaired t test
h	BRP intensity (normalized to control)	Nlg2 -PhTx (14)	100	7.45
		Nlg2 +PhTx (14)	140.8	8.44	0.0012		t=3.626, df=26	Unpaired t test
i	mEPSP amplitudes	WT -PhTx (23)	0.7044	0.0293
		WT +PhTx (23)	0.4128	0.01672
		Spn -PhTx(21)	0.887	0.03726				2 way ANOVA followed by
		Spn +PhTx(23)	0.6573	0.02965				Holm-Sidak's multiple comparisons test
j	eEPSP amplitudes	WT -PhTx (23)	23.49	1.264
		WT +PhTx (23)	20.4	0.7817
		Spn -PhTx(21)	9.886	0.5738				2 way ANOVA followed by
		Spn +PhTx(23)	10.69	1.034				Holm-Sidak's multiple comparisons test
k	quantal content	WT -PhTx (23)	34.18	2.018
		WT +PhTx (23)	50.44	2.1
		Spn -PhTx(21)	11.43	0.7549				2 way ANOVA followed by
		Spn +PhTx(23)	16.89	1.843				Holm-Sidak's multiple comparisons test
l	mEPSP amplitudes	WT -PhTx (10)	0.6112	0.04893
		WT +PhTx (9)	0.3417	0.01644
		Spn -PhTx(15)	0.5433	0.01786				2 way ANOVA followed by
		Spn +PhTx(14)	0.3653	0.01647				Holm-Sidak's multiple comparisons test
m	eEPSP amplitudes	WT -PhTx (10)	18.36	1.442
		WT +PhTx (9)	16.99	1.822
		Spn -PhTx(15)	8.77	0.91				2 way ANOVA followed by
		Spn +PhTx(14)	3.272	0.391				Holm-Sidak's multiple comparisons test
n	quantal content	WT -PhTx (23)	31.16	3.245
		WT +PhTx (23)	49.96	4.944
		Spn -PhTx(21)	16.35	1.653				2 way ANOVA followed by
		Spn +PhTx(23)	9.132	1.148				Holm-Sidak's multiple comparisons test
										1
