# Supplementary material for: An antagonism between Spinophilin and Syd-1 operates upstream of memory-promoting presynaptic long-term plasticity
Source: eLife. 2023 Sep 28;12:e86084. doi: 10.7554/eLife.86084 (PMC10588984; doi:10.7554/eLife.86084)
Supplement: Figure 1—figure supplement 2—source data 1. [file elife-86084-fig1-figsupp2-data1.xlsx]

## Sheet: Sheet1
Figure 1 - Figure supplement 2	Parameter	Genotype (n)	Mean	SEM	P	U	t, df	test
b	BRP intensity (normalized to control)	Ok6-Gal4/+ -PhTx (17)	100	2.849
		Ok6-Gal4/+ +PhTx (15)	132.9	5.535	<0.0001		t=5.466, df=30	Unpaired t test
		Ok6-Gal4/+,Spn -PhTx (12)	100	7.345
		Ok6-Gal4/+,Spn +PhTx (12)	85.2	5.109	0.2189	50		Mann Whitney test
		Ok6-Gal4>UAS-Spn,Spn -PhTx (18)	100	5.05
		Ok6-Gal4>UAS-Spn,Spn +PhTx (24)	142.3	4.6	<0.0001		t=6.147, df=40	Unpaired t test
d	Normalized mEPSP amplitudes	Control -PhTx (16)	1	0.05188
		Control +PhTx (12)	0.6905	0.0596	0.0006		t=3.913, df=26	Unpaired t test
		Ok6-Gal4>UAS-Spn,Spn -PhTx (21)	1	0.03969
		Ok6-Gal4>UAS-Spn,Spn +PhTx (18)	0.7168	0.02915	<0.0001		t=5.586, df=37	Unpaired t test
e	Normalized eEPSP amplitudes	Control -PhTx (16)	1	0.03715
		Control +PhTx (12)	0.9259	0.07257	0.3376		t=0.9769, df=26	Unpaired t test
		Ok6-Gal4>UAS-Spn,Spn -PhTx (21)	1	0.05879
		Ok6-Gal4>UAS-Spn,Spn +PhTx (18)	1.04	0.07403	0.6739		t=0.4241, df=37	Unpaired t test
f	Normalized quantal content	Control -PhTx (16)	1	0.04395
		Control +PhTx (12)	1.364	0.1162	0.0032		t=3.247, df=26	Unpaired t test
		Ok6-Gal4>UAS-Spn,Spn -PhTx (21)	1	0.04738
		Ok6-Gal4>UAS-Spn,Spn +PhTx (18)	1.448	0.09091	<0.0001		t=4.556, df=37	Unpaired t test
g	mEPSP amplitudes	Control -PhTx (16)	0.6039	0.03133
		Control +PhTx (12)	0.417	0.03599
		Ok6-Gal4>UAS-Spn,Spn -PhTx (21)	0.6295	0.02498				2 way ANOVA followed by
		Ok6-Gal4>UAS-Spn,Spn +PhTx (18)	0.4512	0.01835				Holm-Sidak's multiple comparisons test
h	eEPSP amplitudes	Control -PhTx (16)	20.36	0.7565
		Control +PhTx (12)	18.85	1.478
		Ok6-Gal4>UAS-Spn,Spn -PhTx (21)	16.73	0.9837				2 way ANOVA followed by
		Ok6-Gal4>UAS-Spn,Spn +PhTx (18)	17.39	1.239				Holm-Sidak's multiple comparisons test
i	quantal content	Control -PhTx (16)	34.49	1.516
		Control +PhTx (12)	47.06	4.008
		Ok6-Gal4>UAS-Spn,Spn -PhTx (21)	26.77	1.268				2 way ANOVA followed by
		Ok6-Gal4>UAS-Spn,Spn +PhTx (18)	38.77	2.433				Holm-Sidak's multiple comparisons test
j	Normalized mEPSP amplitudes	Control -PhTx (14)	1	0.05283
		Control +PhTx (16)	0.5348	0.0289	<0.0001		t=7.992, df=28	Unpaired t test
		Mef2-Gal4>UAS-Spn,Spn -PhTx (18)	1	0.04116
		Mef2-Gal4>UAS-Spn,Spn +PhTx (18)	0.7492	0.04811	0.0004		t=3.961, df=34	Unpaired t test
k	Normalized eEPSP amplitudes	Control -PhTx (14)	1	0.04285
		Control +PhTx (16)	0.9629	0.05103	0.5883		t=0.5476, df=28	Unpaired t test
		Mef2-Gal4>UAS-Spn,Spn -PhTx (18)	1	0.1213
		Mef2-Gal4>UAS-Spn,Spn +PhTx (18)	1.02	0.1085	0.9012		t=0.1251, df=34	Unpaired t test
l	Normalized quantal content	Control -PhTx (14)	1	0.04404
		Control +PhTx (16)	1.826	0.1314	<0.0001		t=5.633, df=28	Unpaired t test
		Mef2-Gal4>UAS-Spn,Spn -PhTx (18)	1	0.1174
		Mef2-Gal4>UAS-Spn,Spn +PhTx (18)	1.42	0.1506	0.0224	90		Mann Whitney test
m	mEPSP amplitudes	Control -PhTx (14)	1	0.05188
		Control +PhTx (16)	0.6905	0.0596
		Mef2-Gal4>UAS-Spn,Spn -PhTx (18)	1	0.03969				2 way ANOVA followed by
		Mef2-Gal4>UAS-Spn,Spn +PhTx (18)	0.7168	0.02915				Holm-Sidak's multiple comparisons test
n	eEPSP amplitudes	Control -PhTx (14)	23.4	1.003
		Control +PhTx (16)	22.53	1.194
		Mef2-Gal4>UAS-Spn,Spn -PhTx (18)	10.73	1.303				2 way ANOVA followed by
		Mef2-Gal4>UAS-Spn,Spn +PhTx (18)	10.95	1.165				Holm-Sidak's multiple comparisons test
o	quantal content	Control -PhTx (14)	35.78	1.576
		Control +PhTx (16)	65.35	4.703
		Mef2-Gal4>UAS-Spn,Spn -PhTx (18)	16.93	1.988				2 way ANOVA followed by
		Mef2-Gal4>UAS-Spn,Spn +PhTx (18)	24.04	2.549				Holm-Sidak's multiple comparisons test
										1
