# Supplementary material for: An antagonism between Spinophilin and Syd-1 operates upstream of memory-promoting presynaptic long-term plasticity
Source: eLife. 2023 Sep 28;12:e86084. doi: 10.7554/eLife.86084 (PMC10588984; doi:10.7554/eLife.86084)
Supplement: Figure 1—source data 1. [file elife-86084-fig1-data1.xlsx]

## Sheet: Sheet1
Figure 1	Parameter	Genotype (n)	Mean	SEM	P	U	t. df	test
b	BRP intensity (normalized to control)	WT -PhTx (17)	100	4.045
		WT +PhTx (20)	128.2	4.922	0.0001		t=4.324, df=35	Unpaired t test
		Spn -PhTx(15)	100	5.308
		Spn +PhTx(20)	94.17	7.176	0.5435		t=4.324, df=35	Unpaired t test
d	Unc13A intensity (normalized to control)	WT -PhTx (17)	100	5.153
		WT +PhTx (20)	115.8	5.199	0.0344		t=2.163, df=61	Unpaired t test
		Spn -PhTx(15)	100	5.272
		Spn +PhTx(20)	85.28	5.044	0.0478		t=2.018, df=64	Unpaired t test
g	Normalized mEPSP amplitudes	WT -PhTx (23)	1	0.0416
		WT +PhTx (23)	0.586	0.02373	<0.0001		t=8.645, df=34.95	Unpaired t test with Welch's correction
		Spn -PhTx(21)	1	0.04201
		Spn +PhTx(23)	0.741	0.03343	<0.0001		t=4.865, df=42	Unpaired t test
h	Normalized eEPSP amplitudes	WT -PhTx (23)	1	0.05383
		WT +PhTx (23)	0.8687	0.03328	0.045		t=2.075, df=36.68	Unpaired t test with Welch's correction
		Spn -PhTx(21)	1	0.05804
		Spn +PhTx(23)	1.081	0.1045	0.5023		t=0.6781, df=34.09	Unpaired t test with Welch's correction
i	Normalized quantal content	WT -PhTx (23)	1	0.05905
		WT +PhTx (23)	1.475	0.06144	<0.0001	61		Mann Whitney test
		Spn -PhTx(21)	1	0.06604
		Spn +PhTx(23)	1.478	0.1612	0.0103		t=2.742, df=29.10	Unpaired t test with Welch's correction
j	Normalized mEPSP amplitudes	WT -PhTx (10)	1	0.08006
		WT +PhTx (9)	0.559	0.02689	0.0003		t=5.222, df=10.99	Unpaired t test with Welch's correction
		Spn -PhTx(15)	1	0.03286
		Spn +PhTx(14)	0.6723	0.03031	<0.0001		t=7.300, df=27	Unpaired t test
k	Normalized eEPSP amplitudes	WT -PhTx (10)	1	0.07852
		WT +PhTx (9)	0.9253	0.09919	0.559		t=0.5960, df=17	Unpaired t test
		Spn -PhTx(15)	1	0.1038
		Spn +PhTx(14)	0.3732	0.04458	<0.0001		t=5.550, df=18.95	Unpaired t test with Welch's correction
l	Normalized quantal content	WT -PhTx (23)	1	0.1042
		WT +PhTx (23)	1.603	0.1587	0.0057	12		Mann Whitney test
		Spn -PhTx(21)	1	0.1011
		Spn +PhTx(23)	0.5584	0.07019	0.0015		t=3.540, df=27	Unpaired t test
	1
