# Supplementary material for: An antagonism between Spinophilin and Syd-1 operates upstream of memory-promoting presynaptic long-term plasticity
Source: eLife. 2023 Sep 28;12:e86084. doi: 10.7554/eLife.86084 (PMC10588984; doi:10.7554/eLife.86084)
Supplement: Figure 2—figure supplement 1—source data 1. [file elife-86084-fig2-figsupp1-data1.xlsx]

## Sheet: Sheet1
Figure 2 - Figure supplement 1	Parameter	Genotype (n)	Mean	SEM	P	U	t, df	test
j	mEPSP amplitudes	WT -PhTx (14)	0.5638	0.03914
		WT +PhTx (14)	0.4039	0.0326
		Syd-1 -PhTx(14)	0.6614	0.02973				2 way ANOVA followed by
		Syd-1 +PhTx(13)	0.4428	0.02481				Holm-Sidak's multiple comparisons test
k	eEPSP amplitudes	WT -PhTx (14)	22.01	0.8649
		WT +PhTx (14)	22.4	1.417
		Syd-1 -PhTx(14)	17.07	1.216				2 way ANOVA followed by
		Syd-1 +PhTx(13)	20.54	1.899				Holm-Sidak's multiple comparisons test
l	quantal content	WT -PhTx (14)	41.5	3.169
		WT +PhTx (14)	57.7	3.547
		Syd-1 -PhTx(14)	25.92	1.571				2 way ANOVA followed by
		Syd-1 +PhTx(13)	46.59	3.531				Holm-Sidak's multiple comparisons test
m	mEPSP amplitudes	WT -PhTx (15)	0.6201	0.03457
		WT +PhTx (13)	0.3594	0.02364
		Spn, Syd-1/+ -PhTx(17)	0.5918	0.03309				2 way ANOVA followed by
		Spn, Syd-1/+ +PhTx(17)	0.4205	0.01882				Holm-Sidak's multiple comparisons test
n	eEPSP amplitudes	WT -PhTx (15)	20.42	0.9872
		WT +PhTx (13)	19.52	0.6225
		Spn, Syd-1/+ -PhTx(17)	10.87	0.7981				2 way ANOVA followed by
		Spn, Syd-1/+ +PhTx(17)	11.82	1.012				Holm-Sidak's multiple comparisons test
o	quantal content	WT -PhTx (15)	33.83	1.913
		WT +PhTx (13)	57.33	4.268
		Spn, Syd-1/+ -PhTx(17)	19.81	2.086				2 way ANOVA followed by
		Spn, Syd-1/+ +PhTx(17)	28.6	2.458				Holm-Sidak's multiple comparisons test
										1
