# Supplementary material for: An antagonism between Spinophilin and Syd-1 operates upstream of memory-promoting presynaptic long-term plasticity
Source: eLife. 2023 Sep 28;12:e86084. doi: 10.7554/eLife.86084 (PMC10588984; doi:10.7554/eLife.86084)
Supplement: Figure 2—source data 1. [file elife-86084-fig2-data1.xlsx]

## Sheet: Sheet1
Figure 2	Parameter	Genotype (n)	Mean ± SEM		P	U	t	test
b	BRP intensity (normalized to control)	WT -PhTx (24)	100	3.786
		WT +PhTx (28)	115	5.631	0.0318		t=2.215, df=45.91	Unpaired t test with Welch's correction
		Syd-1 -PhTx(14)	100	9.645
		Syd-1 +PhTx(22)	134.1	9.487	0.0217		t=2.407, df=34	Unpaired t test
d	BRP intensity (normalized to control)	WT -PhTx (29)	100	2.557
		WT +PhTx (34)	115.5	2.857	0.0002		t=3.978, df=61	Unpaired t test
		Spn -PhTx(14)	100	4.394
		Spn +PhTx(16)	101.2	3.633	0.8398		t=0.2040, df=28	Unpaired t test
		Spn, Syd-1/+ -PhTx(28)	100	2.924
		Spn, Syd-1/+ +PhTx(28)	122.4	3.925	<0.0001	139		Mann Whitney test
g	Normalized mEPSP amplitudes	WT -PhTx (14)	1	0.06943
		WT +PhTx (14)	0.7165	0.05782	0.0042		t=3.138, df=26	Unpaired t test
		Syd-1 -PhTx(14)	1	0.04495
		Syd-1 +PhTx(13)	0.6696	0.03751	<0.0001		t=5.597, df=25	Unpaired t test
h	Normalized eEPSP amplitudes	WT -PhTx (14)	1	0.03929
		WT +PhTx (14)	1.018	0.06435	0.8181		t=0.2324, df=26	Unpaired t test
		Syd-1 -PhTx(14)	1	0.07124
		Syd-1 +PhTx(13)	1.204	0.1113	0.1304		t=1.564, df=25	Unpaired t test
i	Normalized quantal content	WT -PhTx (14)	1	0.07637
		WT +PhTx (14)	1.391	0.08546	0.0021		t=3.407, df=26	Unpaired t test
		Syd-1 -PhTx(14)	1	0.06063
		Syd-1 +PhTx(13)	1.798	0.1362	<0.0001		t=5.349, df=16.62	Unpaired t test with Welch's correction
j	Normalized mEPSP amplitudes	WT -PhTx (15)	1	0.05575
		WT +PhTx (13)	0.5795	0.03812	<0.0001		t=6.033, df=26	Unpaired t test
		Spn, Syd-1/+ -PhTx(17)	1	0.05591
		Spn, Syd-1/+ +PhTx(17)	0.7105	0.0318	0.0001		t=4.500, df=25.37	Unpaired t test with Welch's correction
k	Normalized eEPSP amplitudes	WT -PhTx (15)	1	0.04834
		WT +PhTx (13)	0.9557	0.03048	0.4614		t=0.7476, df=26	Unpaired t test
		Spn, Syd-1/+ -PhTx(17)	1	0.07342
		Spn, Syd-1/+ +PhTx(17)	1.087	0.09308		121		Mann Whitney test
l	Normalized quantal content	WT -PhTx (15)	1	0.05654
		WT +PhTx (13)	1.695	0.1262	0.0001		t=5.024, df=16.73	Unpaired t test with Welch's correction
		Spn, Syd-1/+ -PhTx(17)	1	0.1053
		Spn, Syd-1/+ +PhTx(17)	1.444	0.1241	0.0103		t=2.727, df=32	Unpaired t test
n	BRP intensity (normalized to control)	WT -PhTx (22)	100	6.347
		WT +PhTx (26)	94.01	5.085	0.4599		t=0.7453, df=46	Unpaired t test
		Syd-1 -PhTx(21)	100	3.496
		Syd-1 +PhTx(19)	132.7	9.563	0.0039		t=3.214, df=22.77	Unpaired t test with Welch's correction
	1
