# Supplementary material for: An antagonism between Spinophilin and Syd-1 operates upstream of memory-promoting presynaptic long-term plasticity
Source: eLife. 2023 Sep 28;12:e86084. doi: 10.7554/eLife.86084 (PMC10588984; doi:10.7554/eLife.86084)
Supplement: Figure 3—figure supplement 1—source data 1. [file elife-86084-fig3-figsupp1-data1.xlsx]

## Sheet: Sheet1
Figure 3 - Figure supplement 1	Parameter	Genotype (n)	Mean	SEM	P	U	t, df	test
c	Normalized mEPSP amplitudes	w1118 -Chx -PhTx (8)	1	0.07108
		w1118 -Chx +PhTx (10)	0.5474	0.03106	<0.0001		t=6.277, df=16	Unpaired t test
		w1118 +Chx -PhTx (10)	1	0.1064
		w1118 +Chx +PhTx (10)	0.6568	0.03643	0.0109		t=3.051, df=11.08	Unpaired t test with Welch's correction
d	Normalized eEPSP amplitudes	w1118 -Chx -PhTx (8)	1	0.04089
		w1118 -Chx +PhTx (10)	0.8805	0.08925	0.246		t=1.217, df=12.47	Unpaired t test with Welch's correction
		w1118 +Chx -PhTx (10)	1	0.04481
		w1118 +Chx +PhTx (10)	1.019	0.05632	0.7993		t=0.2581, df=18	Unpaired t test
e	Normalized quantal content	w1118 -Chx -PhTx (8)	1	0.06161
		w1118 -Chx +PhTx (10)	1.597	0.1759	0.0083		t=3.200, df=11.13	Unpaired t test with Welch's correction
		w1118 +Chx -PhTx (10)	1	0.09083
		w1118 +Chx +PhTx (10)	1.49	0.1237	0.005		t=3.195, df=18	Unpaired t test
f	Normalized mEPSP amplitudes	w1118 -Chx -PhTx (10)	1	0.05531
		w1118 -Chx +PhTx (10)	0.5279	0.04964	<0.0001	0		Mann Whitney test
		w1118 +Chx -PhTx (10)	1	0.05889
		w1118 +Chx +PhTx (10)	0.4166	0.02552	<0.0001		t=9.090, df=12.27	Unpaired t test with Welch's correction
g	Normalized eEPSP amplitudes	w1118 -Chx -PhTx (10)	1	0.07318
		w1118 -Chx +PhTx (10)	0.798	0.09547	0.1104		t=1.679, df=18	Unpaired t test
		w1118 +Chx -PhTx (10)	1	0.04322
		w1118 +Chx +PhTx (10)	0.7816	0.1231	0.1113		t=1.674, df=18	Unpaired t test
h	Normalized quantal content	w1118 -Chx -PhTx (10)	1	0.06601
		w1118 -Chx +PhTx (10)	1.522	0.1684	0.014		t=2.884, df=11.70	Unpaired t test
		w1118 +Chx -PhTx (10)	1	0.05633
		w1118 +Chx +PhTx (10)	1.744	0.2279	0.0099		t=3.169, df=10.10	Unpaired t test with Welch's correction
										1
