# Supplementary material for: An antagonism between Spinophilin and Syd-1 operates upstream of memory-promoting presynaptic long-term plasticity
Source: eLife. 2023 Sep 28;12:e86084. doi: 10.7554/eLife.86084 (PMC10588984; doi:10.7554/eLife.86084)
Supplement: Figure 4—source data 1. [file elife-86084-fig4-data1.xlsx]

## Sheet: Sheet1
Figure 4	Parameter	Genotype (n)	Mean	SEM	P	U	t, df	test
b	Actin5CGFP intensity (normalized to control)	Control (12)	100	3.351
		Spn (12)	144.8	8.339	0.0002		t=4.983, df=14.46	Unpaired t test with Welch's correction
d	Actin5CGFP intensity (normalized to control)	Control (12)	100	3.843
		Syd-1 (12)	80.93	3.072	0.0008		t=3.875, df=22	Unpaired t test
h	Actin5CGFP FRAP (normalized to control)	Control (19)	100	9.199
		Spn (17)	128.5	8.212	0.0283		t=2.291, df=34	Unpaired t test
i	Actin5CGFP FRAP (normalized to control)	Control (12)	100	6.414
		Syd-1 (12)	72.65	10.11	0.0323		t=2.285, df=22	Unpaired t test
j	Actin5CGFP FRAP (normalized to control)	Control (10)	100	12.47
		Spn (11)	139.7	5.975	0.0271			Ordinary one-way ANOVA followed by
		Spn, Syd-1/+ (12)	103.8	10.74	0.961			Tukey's multiple comparisons test
