# Supplementary material for: An antagonism between Spinophilin and Syd-1 operates upstream of memory-promoting presynaptic long-term plasticity
Source: eLife. 2023 Sep 28;12:e86084. doi: 10.7554/eLife.86084 (PMC10588984; doi:10.7554/eLife.86084)
Supplement: Figure 5—figure supplement 1—source data 1. [file elife-86084-fig5-figsupp1-data1.xlsx]

## Sheet: Sheet1
Figure 5 - Figure supplement 1	Parameter	Genotype (n)	Mean	SEM	P	U	t, df	test
b	Mical intensity (normalized to control)	w1118 (23)	94.99	3.207
		Spn (30)	57.76	2.844	****			Ordinary one-way ANOVA followed by
		Syd-1 (30)	102.1	3.162	ns			Tukey's multiple comparisons test
d	Mical intensity (normalized to control)	w1118 (23)	100	2.789
		Spn (30)	77.97	2.509	****			Ordinary one-way ANOVA followed by
		Spn, Syd-1/+ -PhTx(17)	92.25	2.491	ns			Tukey's multiple comparisons test
e	mEPSP amplitudes	Ok6-Gal4>Spn-FL, Spn -PhTx (18)	0.7546	0.05043
		Ok6-Gal4>Spn-FL, Spn +PhTx (13)	0.5105	0.04079
		Ok6-Gal4>Mical-FL, Spn -PhTx (18)	0.8238	0.04547
		Ok6-Gal4>Mical-FL, Spn +PhTx (18)	0.5481	0.03402
		Ok6-Gal4>Mical-dRedox, Spn -PhTx (18)	0.7688	0.05293				2 way ANOVA followed by
		Ok6-Gal4>Mical-dRedox, Spn +PhTx (17)	0.391	0.02631				Holm-Sidak's multiple comparisons test
f	eEPSP amplitudes	Ok6-Gal4>Spn-FL, Spn -PhTx (18)	22.59	1.634
		Ok6-Gal4>Spn-FL, Spn +PhTx (13)	22.11	1.959
		Ok6-Gal4>Mical-FL, Spn -PhTx (18)	23.56	1.766
		Ok6-Gal4>Mical-FL, Spn +PhTx (18)	20.72	1.656
		Ok6-Gal4>Mical-dRedox, Spn -PhTx (18)	20.37	1.467				2 way ANOVA followed by
		Ok6-Gal4>Mical-dRedox, Spn +PhTx (17)	13.06	1.841				Holm-Sidak's multiple comparisons test
g	quantal content	Ok6-Gal4>Spn-FL, Spn -PhTx (18)	30.85	2.103
		Ok6-Gal4>Spn-FL, Spn +PhTx (13)	46.72	5.548
		Ok6-Gal4>Mical-FL, Spn -PhTx (18)	28.9	2.308
		Ok6-Gal4>Mical-FL, Spn +PhTx (18)	39.66	3.742
		Ok6-Gal4>Mical-dRedox, Spn -PhTx (18)	28.57	2.593				2 way ANOVA followed by
		Ok6-Gal4>Mical-dRedox, Spn +PhTx (17)	35.47	5.272				Holm-Sidak's multiple comparisons test
h	mEPSP amplitudes	w1118 +LatB -PhTx (26)	0.6242	0.03444
		w1118 +LatB +PhTx (25)	0.3287	0.01586
		Spn +LatB -PhTx (26)	0.6365	0.04762				2 way ANOVA followed by
		Spn +LatB +PhTx (25)	0.3629	0.02215				Holm-Sidak's multiple comparisons test
i	eEPSP amplitudes	w1118 +LatB -PhTx (26)	24.14	1.101
		w1118 +LatB +PhTx (25)	21.16	0.9156
		Spn +LatB -PhTx (26)	12.41	0.9079				2 way ANOVA followed by
		Spn +LatB +PhTx (25)	10.73	0.8991				Holm-Sidak's multiple comparisons test
j	quantal content	w1118 +LatB -PhTx (26)	40.97	2.384
		w1118 +LatB +PhTx (25)	68.48	4.895
		Spn +LatB -PhTx (26)	22.02	2.298				2 way ANOVA followed by
		Spn +LatB +PhTx (25)	30.61	2.593				Holm-Sidak's multiple comparisons test
										1
