# Supplementary material for: An antagonism between Spinophilin and Syd-1 operates upstream of memory-promoting presynaptic long-term plasticity
Source: eLife. 2023 Sep 28;12:e86084. doi: 10.7554/eLife.86084 (PMC10588984; doi:10.7554/eLife.86084)
Supplement: Figure 5—source data 1. [file elife-86084-fig5-data1.xlsx]

## Sheet: Sheet1
Figure 5	Parameter	Genotype (n)	Mean	SEM	P	U	t, df	test
b	BRP intensity (normalized to control)	Ok6-Gal4>Spn-FL, Spn -PhTx (53)	100	4.098
		Ok6-Gal4>Spn-FL, Spn +PhTx (47)	149.4	7.267	<0.0001	455		Mann Whitney test
		Ok6-Gal4>Mical-FL, Spn -PhTx (27)	100	6.367	<0.0001
		Ok6-Gal4>Mical-FL, Spn +PhTx (22)	155.9	9.877			t=4.924, df=47	Unpaired t test
		Ok6-Gal4>Mical-dRedox, Spn -PhTx (30)	100	5.368
		Ok6-Gal4>Mical-dRedox, Spn +PhTx (24)	115	5.75	0.063		t=1.900, df=52	Unpaired t test
d	Normalized mEPSP amplitudes	Ok6-Gal4>Spn-FL, Spn -PhTx (18)	1	0.06684
		Ok6-Gal4>Spn-FL, Spn +PhTx (13)	0.6765	0.05406	0.0014		t=3.545, df=29	Unpaired t test
		Ok6-Gal4>Mical-FL, Spn -PhTx (17)	1	0.05519
		Ok6-Gal4>Mical-FL, Spn +PhTx (18)	0.6653	0.0413	<0.0001		t=4.893, df=33	Unpaired t test
		Ok6-Gal4>Mical-dRedox, Spn -PhTx (18)	1	0.06884
		Ok6-Gal4>Mical-dRedox, Spn +PhTx (17)	0.5086	0.03422	<0.0001		t=6.393, df=24.83	Unpaired t test with Welch's correction
e	Normalized eEPSP amplitudes	Ok6-Gal4>Spn-FL, Spn -PhTx (18)	1	0.07233
		Ok6-Gal4>Spn-FL, Spn +PhTx (13)	0.9788	0.08671	0.852		t=0.1883, df=29	Unpaired t test
		Ok6-Gal4>Mical-FL, Spn -PhTx (18)	1	0.07496
		Ok6-Gal4>Mical-FL, Spn +PhTx (18)	0.8796	0.07031	0.2494		t=1.172, df=34	Unpaired t test
		Ok6-Gal4>Mical-dRedox, Spn -PhTx (18)	1	0.07203
		Ok6-Gal4>Mical-dRedox, Spn +PhTx (17)	0.6413	0.09038	0.0037		t=3.121, df=33	Unpaired t test
f	Normalized quantal content	Ok6-Gal4>Spn-FL, Spn -PhTx (18)	1	0.06817
		Ok6-Gal4>Spn-FL, Spn +PhTx (13)	1.514	0.1798	0.0056	49		Mann Whitney test
		Ok6-Gal4>Mical-FL, Spn -PhTx (17)	1	0.07985
		Ok6-Gal4>Mical-FL, Spn +PhTx (18)	1.372	0.1295	0.0224	84		Mann Whitney test
		Ok6-Gal4>Mical-dRedox, Spn -PhTx (18)	1	0.09078
		Ok6-Gal4>Mical-dRedox, Spn +PhTx (17)	1.242	0.1845	0.2519		t=1.175, df=23.39	Unpaired t test with Welch's correction
h	BRP intensity (normalized to control)	WT -LatB (32)	100	4.545
		WT +LatB (35)	143.2	10.39	0.0004		t=3.809, df=46.40	Unpaired t test with Welch's correction
		Spn -LatB (16)	100	12.11
		Spn +LatB (16)	133.6	9.385	0.0361		t=2.195, df=30	Unpaired t test
j	Normalized mEPSP amplitudes	WT +LatB -PhTx (26)	1	0.05518
		WT +LatB +PhTx (25)	0.5266	0.02541	<0.0001		t=7.793, df=35.08	Unpaired t test with Welch's correction
		Spn +LatB -PhTx (26)	1	0.07481
		Spn +LatB +PhTx (25)	0.5701	0.0348	<0.0001	87		Mann Whitney test
k	Normalized eEPSP amplitudes	WT +LatB -PhTx (26)	1	0.04562
		WT +LatB +PhTx (25)	0.8768	0.03793	0.044		t=2.068, df=49	Unpaired t test
		Spn +LatB -PhTx (26)	1	0.07317
		Spn +LatB +PhTx (25)	0.8648	0.07246	0.1956		t=1.312, df=49	Unpaired t test
l	Normalized quantal content	WT +LatB -PhTx (26)	1	0.05819
		WT +LatB +PhTx (25)	1.672	0.1195	<0.0001	90		Mann Whitney test
		Spn +LatB -PhTx (26)	1	0.1043
		Spn +LatB +PhTx (25)	1.39	0.1177	0.0154	197		Mann Whitney test
	1
