# Supplementary material for: An antagonism between Spinophilin and Syd-1 operates upstream of memory-promoting presynaptic long-term plasticity
Source: eLife. 2023 Sep 28;12:e86084. doi: 10.7554/eLife.86084 (PMC10588984; doi:10.7554/eLife.86084)
Supplement: Figure 6—figure supplement 1—source data 1. [file elife-86084-fig6-figsupp1-data1.xlsx]

## Sheet: Sheet1
Figure 6 - Figure supplement 1	Parameter	Genotype (n)	Mean	SEM	P	U	t, df	test
a	RRP size	w1118 (18)	472.4	50.82
		spn (16)	243.5	28.15	0.0006		t=3.806, df=32	Unpaired t test
	RRP refilling rate	w1118 (18)	31.91	2.867
		spn (17)	20.82	2.957	0.0111		t=2.692, df=33	Unpaired t test
b	RRP size	WT -PhTx (19)	632.3	71.99
		WT +PhTx (17)	1056	94.81
		Spn -PhTx(16)	383.6	41.99				2 way ANOVA followed by
		Spn +PhTx(16)	503.7	56.48				Holm-Sidak's multiple comparisons test
c	RRP refilling rate	WT -PhTx (19)	40.57	2.845
		WT +PhTx (17)	52.87	5.031
		Spn -PhTx(16)	29.64	3.134				2 way ANOVA followed by
		Spn +PhTx(16)	48.33	4.138				Holm-Sidak's multiple comparisons test
e	Syt1 intensity (normalized to control)	w1118 (25)	100	4.515
		Spn (23)	106	6.362	0.4377		t=0.7830, df=46	Unpaired t test
f	mEPSP amplitudes	w1118 +Y-27632 -PhTx (12)	0.5606	0.04971
		w1118 +Y-27632 +PhTx (12)	0.31	0.03383
		Spn +Y-27632 -PhTx (12)	0.5252	0.05312				2 way ANOVA followed by
		Spn +Y-27632 +PhTx (10)	0.2386	0.02439				Holm-Sidak's multiple comparisons test
g	eEPSP amplitudes	w1118 +Y-27632 -PhTx (12)	27.42	1.138
		w1118 +Y-27632 +PhTx (12)	18.59	2.537
		Spn +Y-27632 -PhTx (12)	8.617	2.01				2 way ANOVA followed by
		Spn +Y-27632 +PhTx (10)	0.7511	0.1772				Holm-Sidak's multiple comparisons test
h	quantal content	w1118 +Y-27632 -PhTx (12)	51.75	3.681
		w1118 +Y-27632 +PhTx (12)	58.91	5.384
		Spn +Y-27632 -PhTx (12)	14.16	2.706				2 way ANOVA followed by
		Spn +Y-27632 +PhTx (10)	2.96	0.5584				Holm-Sidak's multiple comparisons test
j	mEPSP amplitudes	w1118 -Y-27632 (12)	0.5753	0.03584
		w1118 +Y-27632 (12)	0.5606	0.04971	0.8131		t=0.2393, df=22	Unpaired t test
k	eEPSP amplitudes	w1118 -Y-27632 (12)	24.37	1.765
		w1118 +Y-27632 (12)	27.42	1.138	0.1599		t=1.455, df=22	Unpaired t test
l	quantal content	w1118 -Y-27632 (12)	44.61	4.135
		w1118 +Y-27632 (12)	51.75	3.681	0.2107		t=1.289, df=22	Unpaired t test
										1
