# Supplementary material for: An antagonism between Spinophilin and Syd-1 operates upstream of memory-promoting presynaptic long-term plasticity
Source: eLife. 2023 Sep 28;12:e86084. doi: 10.7554/eLife.86084 (PMC10588984; doi:10.7554/eLife.86084)
Supplement: Figure 6—source data 1. [file elife-86084-fig6-data1.xlsx]

## Sheet: Sheet1
Figure 6	Parameter	Genotype (n)	Mean	SEM	P	U	t, df	test
b	Normalized RRP size	WT -PhTx (19)	100	11.39
		WT +PhTx (17)	167	14.99	0.001		t=3.605, df=34	Unpaired t test
		Spn -PhTx(16)	100	10.95
		Spn +PhTx(16)	131.3	14.72	0.0984		t=1.706, df=30	Unpaired t test
c	Normalized RRP refilling rate	WT -PhTx (19)	100	7.013
		WT +PhTx (17)	130.3	12.4	0.0432		t=2.128, df=25.55	Unpaired t test with Welch's correction
		Spn -PhTx(16)	100	10.57
		Spn +PhTx(16)	163	13.96	0.0011		t=3.599, df=30	Unpaired t test
e	Number of SVs	WT (11)	177.5	18.05
		Spn (21)	219.9	27.17	0.2035		t=1.300, df=29.90	Unpaired t test with Welch's correction
f	SV density	WT (11)	9722620873	1031937227
		Spn (21)	10979228377	1067211187	0.4545		t=0.7578, df=30	Unpaired t test
g	number of SVs around T-bar	WT (13)	29.92	2.93
		Spn (31)	21.42	1.583	0.0087		t=2.753, df=42	t=2.753, df=42
h	Multiple t tests of mean+sem of number of SVs in shells around T-bar	50nm	1.53846	0.417799	1.1e-05		42
		70nm	3.07692	0.614583	0.000737		42
		90nm	4.23077	0.520772	0.003807		42
		110nm	4.23077	0.394739	0.011486		42
		130nm	4.07692	0.654976	0.389132		42
		150nm	4.15385	0.618581	0.193256		42
		170nm	4.76923	0.777519	0.347454		42
		190nm	3.84615	0.51697	0.937006		42
j	BRP intensity (normalized to control)	w1118 -PhTx (35)	100	2.382
		w1118 +PhTx (35)	110.5	3.499
		w1118 +Y-27632 -PhTx (30)	92.65	3.773				2 way ANOVA followed by
		w1118 +Y-27632 +PhTx (43)	85.11	2.558				Holm-Sidak's multiple comparisons test
l	Normalized mEPSP amplitudes	w1118 +Y-27632 -PhTx (12)	1	0.08868
		w1118 +Y-27632 +PhTx (12)	0.553	0.06035	0.0004		t=4.167, df=22	Unpaired t test
		Spn +Y-27632 -PhTx (12)	1	0.1012
		Spn +Y-27632 +PhTx (10)	0.4543	0.04645	0.0002		t=4.902, df=15.30	Unpaired t test with Welch's correction
m	Normalized eEPSP amplitudes	w1118 +Y-27632 -PhTx (12)	1	0.04151
		w1118 +Y-27632 +PhTx (12)	0.6778	0.09251	0.0061		t=3,177, df=15,26	Unpaired t test with Welch's correction
		Spn +Y-27632 -PhTx (12)	1	0.2332
		Spn +Y-27632 +PhTx (10)	0.08717	0.02057	0.0002	8		Mann Whitney test
n	Normalized quantal content	w1118 +Y-27632 -PhTx (12)	1	0.07112
		w1118 +Y-27632 +PhTx (12)	1.138	0.104	0.2841		t=1.098, df=22	Unpaired t test
		Spn +Y-27632 -PhTx (12)	1	0.1911
		Spn +Y-27632 +PhTx (10)	0.2091	0.03944	0.0016		t=4.053, df=11.93	Unpaired t test with Welch's correction
	1
