# Supplementary material for: An antagonism between Spinophilin and Syd-1 operates upstream of memory-promoting presynaptic long-term plasticity
Source: eLife. 2023 Sep 28;12:e86084. doi: 10.7554/eLife.86084 (PMC10588984; doi:10.7554/eLife.86084)
Supplement: Figure 7—figure supplement 1—source data 1. [file elife-86084-fig7-figsupp1-data1.xlsx]

## Sheet: Sheet1
Figure 7 - Figure Supplement 1
c	ARM 1 h: F(3,21) = 0.1077, p = 0.8985, n = 7.
d	ASM 1 h: F(3,21) = 6.689, p = 0.0067, n = 7, post hoc Tuckey’s multiple comparisons, Gal80ts;OK107/+ vs Gal80ts;OK107/RNAi-Spn *p < 0.05, Gal80ts;OK107/RNAi-Spn vs +/RNAi-Spn **p < 0.01.
e	MTM 1 h 18°C: F(3,24) = 1.372, p = 0.2753, n = 8.
f	ARM 3 h: F(3,33) = 0.3117, p = 0.7345, n = 11.
g	ASM 3 h: F(3,33) = 24.86, p < 0.0001, n = 11, post hoc Tuckey’s multiple comparisons, Gal80ts;OK107/+ vs Gal80ts;OK107/RNAi-Spn ****p < 0.0001, Gal80ts;OK107/RNAi-Spn vs +/RNAi-Spn ****p < 0.0001.
h	MTM 18°C 3 h: F(3,24) = 7.533, p = 0.0034, n = 8, post hoc Tuckey’s multiple comparisons, Gal80ts;OK107/+ vs +/RNAi-Spn **p < 0.001, Gal80ts;OK107/+ vs Gal80ts;OK107/RNAi-Spn p > 0.05, +/RNAi-Spn vs Gal80ts;OK107/RNAi-Spn *p < 0.05.
i	ARM 3 h: F(3,25) = 0.2999, p = 0.7438, n ≥ 8.
j	ASM 3 h: F(3,25) = 5.390, p = 0.0124, n ≥ 8, post hoc Tuckey’s multiple comparisons, Gal80ts;OK107/+ vs Gal80ts;OK107/RNAi-Syd1 *p < 0.05, Gal80ts;OK107/RNAi-Syd1 vs +/RNAi-Syd1 *p < 0.05.
k	MTM 3 h 18°C: F(3,26) = 0.2133, p = 0.8095, n ≥ 7.
	Table RNAi-Spn and RNAi-Syd1:
	Table 1: Shock reactivity and olfactory acuity of flies expressing RNAi-Spn and RNAi-Syd1
			Olfactory sensitivity
	Genotype	Shock reactivity	Octanol	Methylcyclohexanol
	Gal80ts;OK107/+	0.7950 ± 0.03964	0.4783 ± 0.09898	0.5050 ± 0.06786
	Gal80ts;OK107/RNAi-Spn	0.7700 ± 0.09256	0.7200 ± 0.07297	0.5525 ± 0.08664
	+/RNAi-Spn	0.9050 ± 0.04485	0.5100 ± 0.07474	0.6733 ± 0.05643
	Gal80ts;OK107/+	0.6733 ± 0.1164	0.5383 ± 0.09257	0.3683 ± 0.1029
	Gal80ts;OK107/RNAi-Syd1	0.6783 ± 0.1044	0.4567 ± 0.06687	0.2633 ± 0.05123
	+/RNAi-Syd1	0.7167 ± 0.05925	0.4033 ± 0.063835	0.2433 ± 0.05806
	RNAi-Spn: OCT: F(3,20) = 2.773, p = 0.0907, n ≥ 6. MCH: F(3,20) = 1.189, p = 0.3287, n ≥ 6. Shocks: F(3,19) = 1.106, p = 0.3549, n ≥ 6.
	RNAi-Syd1: OCT: F(3,18) = 0.7831, p = 0.4748, n =6. MCH: F(3,18) = 0.8158, p = 0.4610, n = 6. Shocks: F(3,18) = 0.06031, p = 0.9417, n = 6.
	MTM conditioning:
	Figure 7 a,c
	Gal80ts;OK107/+:
	BRP: F(3,36) = 4.588, p = 0.0175, n = 12, post hoc Tuckey’s multiple comparisons, Gal80ts;OK107/+ ctrl vs Gal80ts;OK107/+ 1 h *p < 0.05 ; Gal80ts;OK107/+ ctrl vs Gal80ts;OK107/+ 3 h *p < 0.05.
	Unc13A: F(3,36) = 2.471, p = 0.1000, n = 12
	Gal80ts;OK107/RNAi-Spn:
	Figure 7 b,d
	BRP: F(3,32) = 0.5594, p = 0.5776, n ≥ 9
	Unc13A: F(3,32) = 1.018, p = 0.3740, n ≥ 0
