# Supplementary material for: An antagonism between Spinophilin and Syd-1 operates upstream of memory-promoting presynaptic long-term plasticity
Source: eLife. 2023 Sep 28;12:e86084. doi: 10.7554/eLife.86084 (PMC10588984; doi:10.7554/eLife.86084)
Supplement: Figure 7—figure supplement 2—source data 1. [file elife-86084-fig7-figsupp2-data1.xlsx]

## Sheet: Sheet1
Figure 7 - Figure supplement 2
a	MTM 1 h: F(6,54) = 8.795, p < 0.0001, n ≥ 8, post hoc Tuckey’s multiple comparisons, Gal80ts;OK107/+ vs +/spnex3.1 *p < 0.05, Gal80ts;OK107/+ vs +/spnex3.1;RNAi-Syd1 *p < 0.05, Gal80ts;OK107/spnex3.1;RNAi-Syd1 vs Gal80ts;OK107/RNAi-Syd1 *p < 0.05, +/spnex3.1;RNAi-Syd1 vs Gal80ts;OK107/spnex3.1;RNAi-Syd1 p > 0.05.
b	MTM 1 h: F(6,68) = 7.696, p < 0.0001, n ≥ 8, post hoc Tuckey’s multiple comparisons, Gal80ts;OK107/+ vs +/syd1ex3.4 p > 0.05, Gal80ts;OK107/+ vs Gal80ts;OK107/syd1ex3.4;RNAi-Spn **p < 0.01, +/syd1ex3.4;RNAi-Spn vs Gal80ts;OK107/syd1ex3.4;RNAi-Spn *p < 0.05, Gal80ts;OK107/+ vs Gal80ts;OK107/RNAi-Spn **p < 0.01, +/RNAi-Spn vs Gal80ts;OK107/RNAi-Spn **p < 0.01, Gal80ts;OK107/syd1ex3.4;RNAi-Spn vs Ga…
c	MTM 3 h 18°C: F(6,46) = 10.27, p < 0.0001, n ≥ 7, post hoc Tuckey’s multiple comparisons, +/spnex3.1;RNAi-Syd1 vs Gal80ts;OK107/spnex3.1;RNAi-Syd1 p > 0.05; Gal80ts;OK107/spnex3.1;RNAi-Syd1 vs Gal80ts;OK107/RNAi-Syd1 **p < 0.01.
d	MTM 3 h 18°C: F(6,42) = 0.6213, p = 0.6844, n = 7.
	Table: rescue experiment
	Table 2: Shock reactivity and olfactory acuity of the rescue experiment
			Olfactory sensitivity
	Genotype	Shock reactivity	Octanol	Methylcyclohexanol
	Gal80ts;OK107/+	0.8817 + 0.02056	0.5500 + 0.04676	0.3317 + 0.06799
	+/spnex3.1	0.8550 + 0.03374	0.5233 + 0.05327	0.4100 + 0.06688
	+/spnex3.1;RNAi-Syd1	0.8400 + 0.07416	0.3833 + 0.07548	0.3417 + 0.06290
	Gal80ts;OK107/spnex3.1;RNAi-Syd1	0.9167 + 0.01116	0.4100 + 0.06817	0.3450 + 0.05470
	Gal80ts;OK107/RNAi-Syd1	0.8250 + 0.03603	0.4950 + 0.08652	0.3200 + 0.03011
	+/RNAi-Syd1	0.8857 + 0.02235	0.3367 + 0.06037	0.4133 + 0.04363
	Gal80ts;OK107/+	0.8750 + 0.02232	0.4517 + 0.07195	0.3017 + 0.03790
	+/syd1ex3.4	0.7967 + 0.04425	0.6017 + 0.07731	0.4900 + 0.08363
	+/syd1ex3.4;RNAi-Spn	0.8233 + 0.03818	0.4267 + 0.07205	0.4150 + 0.122
	Gal80ts;OK107/syd1ex3.4;RNAi-Spn	0.9367 + 0.03062	0.5533 + 0.08857	0.4017 + 0.04438
	Gal80ts;OK107/RNAi-Spn	0.8402 + 0.05829	0.5167 + 0.05506	0.4967 + 0.1273
	+/RNAi-Spn	0.9233 + 0.03242	0.5983 + 0.05300	0.7550 + 0.06265
	spnex3.1;RNAi-Syd1: OCT: F(6,36) = 1.643, p = 0.1790, n = 6. MCH: F(6,36) = 0.5287, p = 0.7527, n = 6. Shocks: F(6,37= 0.7728, p = 0.5767, n ≥ 6.
	syd1ex3.4;RNAi-Spn: OCT: F(6,36) = 1.086, p = 0.3882, n = 6. MCH: F(6,36) = 3.117, p = 0.0221, n = 6, post hoc Tuckey’s multiple comparisons, Gal80ts;OK107/+ vs Gal80ts;OK107/RNAi-Spn *p < 0.05. Shocks: F(6,36) = 2.020, p = 0.1043, n =6.
