# Supplementary material for: An antagonism between Spinophilin and Syd-1 operates upstream of memory-promoting presynaptic long-term plasticity
Source: eLife. 2023 Sep 28;12:e86084. doi: 10.7554/eLife.86084 (PMC10588984; doi:10.7554/eLife.86084)
Supplement: Figure 7—source data 1. [file elife-86084-fig7-data1.xlsx]

## Sheet: Sheet1
Figure 7
a	BRP: F(3,36) = 4.588, p = 0.0175, n = 12, post hoc Tuckey’s multiple comparisons, Gal80ts;OK107/+ ctrl vs Gal80ts;OK107/+ 1 h *p < 0.05 ; Gal80ts;OK107/+ ctrl vs Gal80ts;OK107/+ 3 h *p < 0.05.
c	Unc13A: F(3,36) = 2.471, p = 0.1000, n = 12
b	BRP: F(3,32) = 0.5594, p = 0.5776, n ≥ 9
d	Unc13A: F(3,32) = 1.018, p = 0.3740, n ≥ 0
f	STM: F(3,24) = 0.3597, p = 0.7021, n = 8.
h	MTM 1 h: F(3,21) = 9.241, p = 0.0017, n = 7, post hoc Tuckey’s multiple comparisons, Gal80ts;OK107/+ vs Gal80ts;OK107/RNAi-Spn **p < 0.01, Gal80ts;OK107/RNAi-Spn vs +/RNAi-Spn **p < 0.01.
j	MTM 3 h: F(3,30) = 5.282, p = 0.0116, n ≥ 9, post hoc Tuckey’s multiple comparisons, Gal80ts;OK107/+ vs Gal80ts;OK107/RNAi-Spn *p < 0.05, Gal80ts;OK107/RNAi-Spn vs +/RNAi-Spn *p < 0.05.
g	STM: F(3,25) = 0.1359, p = 0.8736, n ≥ 8.
i	MTM 1 h: F(3,28) = 0.4482, p = 0.6438, n ≥ 8.
k	MTM 3 h: F(3,27) = 9.410, p = 0.0010, n = 9, post hoc Tuckey’s multiple comparisons, Gal80ts;OK107/+ vs Gal80ts;OK107/RNAi-Syd1 **p < 0.01, Gal80ts;OK107/RNAi-Syd1 vs +/RNAi-Syd1 **p < 0.01.
l	MTM 3 h: F(6,63) = 11.37, p < 0.0001, n ≥ 9, post hoc Tuckey’s multiple comparisons, Gal80ts;OK107/+ vs Gal80ts;OK107/RNAi-Syd1 **p < 0.01, Gal80ts;OK107/RNAi-Syd1 vs +/RNAi-Syd1 ****p < 0.0001, +/spnex3.1;RNAi-Syd1 vs Gal80ts;OK107/spnex3.1;RNAi-Syd1 **p < 0.01, Gal80ts;OK107/+ vs Gal80ts;OK107/spnex3.1;RNAi-Syd1 p > 0.05, Gal80ts;OK107/spnex3.1;RNAi-Syd1 vs Gal80ts;OK107/RNAi-Syd1 ***p < 0.001.
m	MTM 3 h: F(6,56) = 6.680, p < 0.0001, n ≥ 9, post hoc Tuckey’s multiple comparisons, Gal80ts;OK107/+ vs Gal80ts;OK107/RNAi-Spn ***p < 0.01, Gal80ts;OK107/RNAi-Spn vs +/RNAi-Spn ****p < 0.0001, Gal80ts;OK107/syd1ex3.4;RNAi-Spn vs Gal80ts;OK107/RNAi-Spn ***p < 0.001.
